# Supplementary material
Source: Springer Nature journal article supplement (https://www.springermedizin.de/resource/supplementary/12978_2013_240_MOESM3_ESM.pdf/9602306)

**Question****Answer**

- |                                                                             |                                              |
|-----------------------------------------------------------------------------|----------------------------------------------|
| 1. Negative urine dipstick?                                                 | Yes / No                                     |
| 2. Duration of pain                                                         | Answer in months                             |
| 3. Location of pain and severity?                                           | Description of location with pain score 1-10 |
| 4. Superficial/deep dyspareunia?                                            | Yes / No                                     |
| 5. Pain on full bladder?                                                    | Yes / No                                     |
| 6. Urinary frequency?                                                       | Score 0 (3-6 times) to 4 (over 20 times)     |
| 7. Nocturia?                                                                | Score 0 (never) to 3 (always)                |
| 8. Post void urgency?                                                       | Yes / No                                     |
| 9. Degree of urgency?                                                       | Mild/ moderate/ severe                       |
| 10. Pain associated with bladder, urethra,<br><br>Vagina, perineum, pelvis? | Never/occ/usually/always                     |
| 11. PUF score                                                               | 0 – 35                                       |
| 12. <b>Do you think this patient has BPS?</b>                               | <b>Yes / No</b>                              |
| 13. How certain are you? (0 = uncertain to 10 = very certain)               |                                              |

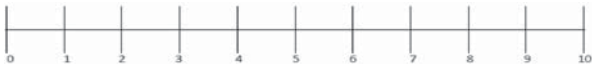

Supplement: MOESM3 [file 9602306]
